# Supplementary material for: Changes in metabolic parameters and adverse kidney and cardiovascular events during glomerulonephritis and renal vasculitis treatment in patients with and without diabetes mellitus
Source: PubMed Central journal article supplement — Kidney Res Clin Pract. 2021 May 21;40(2):250–62. doi: 10.23876/j.krcp.20.174 (PMC8237120; doi:10.23876/j.krcp.20.174), 2021-05-21
Supplement: j-krcp-20-174suppl.pdf [file j-krcp-20-174suppl.pdf]

**Supplementary Table 1. Stratified analysis for associations between diabetes and clinical outcomes**

| Variable                                    | p-value for interaction <sup>a</sup> |                                |       |
|---------------------------------------------|--------------------------------------|--------------------------------|-------|
|                                             | End-stage kidney disease             | Cardiovascular hospitalization | Death |
| Age (yr), <50/≥50                           | 0.740                                | 0.790                          | 0.250 |
| Sex, female/male                            | 0.180                                | 0.010                          | 0.340 |
| Ischemic heart disease, no/yes              | 0.420                                | 0.910                          | 0.980 |
| eGFR (mL/min/1.73 m <sup>2</sup> ), ≥60/<60 | 0.110                                | 0.050                          | 0.970 |
| UPCR (g/g), <3/≥3                           | 0.006                                | 0.460                          | 0.470 |
| ACEi or ARB, no/yes                         | 0.940                                | 0.170                          | 0.280 |
| Immunosuppressant, no/yes                   | 0.350                                | 0.420                          | 0.740 |

ACEi, angiotensin converting enzyme inhibitor; ARB, angiotensin II receptor blocker; eGFR, estimated glomerular filtration rate; UPCR, urine protein-to-creatinine ratio.

ap-value of interaction for effect modification was obtained by putting the interaction term (diabetes\*variable) in the regression model.
